# Supplementary material
Source: PubMed Central journal article supplement (PMC5667359)
Supplement: jamapsychiatry-74-1011-s001.pdf [file jamapsychiatry-74-1011-s001.pdf]

## Supplementary Online Content

Locher C, Koechlin H, Zion SR, et al. Efficacy and safety of selective serotonin reuptake inhibitors, serotonin-norepinephrine reuptake inhibitors, and placebo for common psychiatric disorders among children and adolescents: a systematic review and meta-analysis. *JAMA Psychiatry*. Published online August 30, 2017.  
doi:10.1001/jamapsychiatry.2017.2432

**eAppendix 1.** Search Terms

**eAppendix 2.** Moderator Analyses

**eAppendix 3.** Stratified by Disorder

**eFigure 1.** Flow Chart

**eFigure 2.** Risk of Bias Assessment

**eFigure 3.** Funnel Plots Stratified by Disorder

**eTable 1.** Characteristics of Included Studies

**eTable 2.** Study Heterogeneity

**eTable 3.** Adverse Events

**eTable 4.** Continuous Univariate Moderator Analyses

**eTable 5.** Categorical Univariate Moderator Analyses

**eTable 6.** Multivariate Meta-regression Analyses

This supplementary material has been provided by the authors to give readers additional information about their work.

## eAppendix 1. Search Terms

### PubMed

"Depressive Disorder"[mesh] OR depression\*[tiab] OR depressive[tiab] OR dysthymic[tiab] OR dysthymia\*[tiab] OR "Anxiety Disorders"[Mesh] OR "Anxiety"[Mesh:noexp] OR anxiety[tiab] OR obsessive-compulsive[tiab] OR ocd[tiab] OR anankastic[tiab] OR phobic[tiab] OR phobia\*[tiab] OR panic[tiab] OR stress disorder\*[tiab] OR post traumatic stress[tiab] OR posttraumatic stress[tiab] OR post traumatic symptom\*[tiab] OR posttraumatic symptom\*[tiab] OR ptsd[tiab]

"Serotonin Uptake Inhibitors"[Mesh] OR "Serotonin Uptake Inhibitors"[pa] OR serotonin reuptake inhibitor\*[tiab] OR serotonin uptake inhibitor\*[tiab] OR SSRI\*[tiab] OR SRI\*[tiab] OR serotonin norepinephrine reuptake inhibitor\*[tiab] OR serotonin norepinephrine uptake inhibitor\*[tiab] OR SNRI\* OR venlafaxin\*[tiab] OR desvenlafaxin\*[tiab] OR effexor[tiab] OR pristin[tiab] OR milnacipran[tiab] OR levomilnacipran[tiab] OR fetzima[tiab] OR savella[tiab] OR duloxetine\*[tiab] OR cymbalta[tiab] OR sibutramine[tiab] OR citalopram[tiab] OR celexa[tiab] OR escitalopram[tiab] OR lexapro[tiab] OR fluoxetine\*[tiab] OR prozac[tiab] OR sarafem[tiab] OR symbyax[tiab] OR fluvoxamin\*[tiab] OR luvox[tiab] OR paroxetine\*[tiab] OR paxil[tiab] OR brisdelle[tiab] OR sertraline\*[tiab] OR zoloft[tiab]

Child[MeSH Terms] OR Pediatrics[MeSH] OR child\*[tiab] OR adolescen\*[tiab] OR toddler\*[tiab] OR teen\*[tiab] OR boy[tiab] OR boys[tiab] OR girl\*[tiab] OR pediatric[tiab] OR paediatric[tiab] OR puber\*[tiab] OR pubescen\*[tiab] OR prepubescen\*[tiab] OR prepuberty\*[tiab] OR schoolchild\*[tiab] OR school age\*[tiab] OR preschool\*[tiab] OR kindergar\*[tiab] OR primary school\*[tiab] OR secondary school\*[tiab] OR elementary school\*[tiab] OR high school\*[tiab] OR highschool\*[tiab] OR youth\*[tiab]

random\*[tw] OR blind\*[tiab] OR placebo\*[tiab] OR trial[tiab] OR untreated[tiab] OR "not treated"[tiab] OR sham[tiab]

### Embase

'depression'/exp OR depression\*:ab,ti OR depressive:ab,ti OR dysthymic:ab,ti OR dysthymia\*:ab,ti OR 'anxiety disorder'/exp OR 'anxiety'/de OR anxiety:ab,ti OR obsessive-compulsive:ab,ti OR ocd:ab,ti OR anankastic:ab,ti OR phobic:ab,ti OR phobia\*:ab,ti OR panic:ab,ti OR (stress NEXT/1 disorder\*):ab,ti OR (('post traumatic' OR posttraumatic) NEXT/1 (stress OR symptom\*)):ab,ti OR ptsd:ab,ti

'serotonin uptake inhibitor'/exp OR 'serotonin noradrenalin reuptake inhibitor'/exp OR (('serotonin reuptake' OR 'serotonin uptake' OR 'serotonin norepinephrine reuptake' OR 'serotonin norepinephrine uptake') NEXT/1 inhibitor\*):ab,ti OR ssri\*:ab,ti OR snri\*:ab,ti OR venlafaxin\*:ab,ti OR desvenlafaxin\*:ab,ti OR effexor:ab,ti OR pristin:ab,ti OR milnacipran:ab,ti OR levomilnacipran:ab,ti OR fetzima:ab,ti OR savella:ab,ti OR duloxetine\*:ab,ti OR cymbalta:ab,ti OR sibutramine:ab,ti OR citalopram:ab,ti OR celexa:ab,ti OR escitalopram:ab,ti OR lexapro:ab,ti OR fluoxetine\*:ab,ti OR prozac:ab,ti OR sarafem:ab,ti OR symbyax:ab,ti OR fluvoxamin\*:ab,ti OR luvox:ab,ti OR paroxetine\*:ab,ti OR paxil:ab,ti OR brisdelle:ab,ti OR sertraline\*:ab,ti OR zoloft:ab,ti

'child'/exp AND 'pediatrics'/exp OR child\*:ab,ti OR adolescen\*:ab,ti OR toddler\*:ab,ti OR teen\*:ab,ti OR boy:ab,ti OR boys:ab,ti OR girl\*:ab,ti OR pediatric:ab,ti OR paediatric:ab,ti OR puber\*:ab,ti OR pubescen\*:ab,ti OR prepubescen\*:ab,ti OR prepuberty\*:ab,ti OR schoolchild\*:ab,ti OR (school NEXT/1 age\*):ab,ti OR preschool\*:ab,ti OR kindergar\*:ab,ti OR ((primary OR secondary OR elementary OR high) NEXT/1 school\*):ab,ti OR highschool\*:ab,ti OR youth\*:ab,ti

random\*:ab,de,ti OR blind\*:ab,ti OR placebo\*:ab,ti OR trial:ab,ti OR untreated:ab,ti OR 'not treated':ab,ti OR sham:ab,ti

## PsycInfo

DE ("Major Depression" OR "Dysthymic Disorder" OR "Endogenous Depression" OR "Reactive Depression" OR "Recurrent Depression" OR "Treatment Resistant Depression" OR "Anxiety" OR "AcuteStress Disorder" OR "Generalized Anxiety Disorder" OR "Obsessive Compulsive Disorder" OR "Panic Disorder" OR "Phobias" OR "Posttraumatic Stress Disorder" OR "Panic Disorder" OR "Panic" OR "Panic Attack") OR TI (depression\* OR depressive OR dysthymic OR dysthymia\* OR anxiety OR "obsessive- compulsive" OR ocd OR anankastic OR phobic OR phobia\* OR panic OR "stress disorder\*" OR "post traumatic stress" OR "posttraumatic stress" OR "post traumatic symptom\*" OR "posttraumatic symptom\*" OR ptsd) OR AB (depression\* OR depressive OR dysthymic OR dysthymia\* OR anxiety OR "obsessive- compulsive" OR ocd OR anankastic OR phobic OR phobia\* OR panic OR "stress disorder\*" OR "post traumatic stress" OR "posttraumatic stress" OR "post traumatic symptom\*" OR "posttraumatic symptom\*" OR ptsd)

DE ("Serotonin Reuptake Inhibitors" OR "Chlorimipramine" OR "Citalopram" OR "Fluoxetine" OR "Fluvoxamine" OR "Paroxetine" OR "Zimeldine" OR "Serotonin Norepinephrine Reuptake Inhibitors" OR "Venlafaxine") OR TI ("serotonin reuptake inhibitor\*" OR "serotonin uptake inhibitor\*" OR SSRI\* OR SRI\* OR "serotonin norepinephrine reuptake inhibitor\*" OR "serotonin norepinephrine uptake inhibitor\*" OR SNRI\* OR venlafaxin\* OR desvenlafaxin\* OR effexor OR pristiq OR milnacipran OR levomilnacipran OR fetzima OR savella OR duloxetine\* OR cymbalta OR sibutramine OR citalopram OR celexa OR escitalopram OR lexapro OR fluoxetine\* OR prozac OR sarafem OR symbyax OR fluvoxamin\* OR luvox OR paroxetine\* OR paxil OR brisdelle OR sertraline\* OR zoloft) OR AB ("serotonin reuptake inhibitor\*" OR "serotonin uptake inhibitor\*" OR SSRI\* OR SRI\* OR "serotonin norepinephrine reuptake inhibitor\*" OR "serotonin norepinephrine uptake inhibitor\*" OR SNRI\* OR venlafaxin\* OR desvenlafaxin\* OR effexor OR pristiq OR milnacipran OR levomilnacipran OR fetzima OR savella OR duloxetine\* OR cymbalta OR sibutramine OR citalopram OR celexa OR escitalopram OR lexapro OR fluoxetine\* OR prozac OR sarafem OR symbyax OR fluvoxamin\* OR luvox OR paroxetine\* OR paxil OR brisdelle OR sertraline\* OR zoloft)

AG ("Childhood (birth-12 yrs)") OR TI (child\* OR adolescen\* OR toddler\* OR teen\* OR boy OR boys OR girl\* OR pediatric OR paediatric OR puber\* OR pubescen\* OR prepubescen\* OR prepuberty\* OR schoolchild\* OR "school age\*" OR preschool\* OR kindergar\* OR "primary school\*" OR "secondary school\*" OR "elementary school\*" OR "high school\*" OR highschool\* OR youth\*) OR AB (child\* OR adolescen\* OR toddler\* OR teen\* OR boy OR boys OR girl\* OR pediatric OR paediatric OR puber\* OR pubescen\* OR prepubescen\* OR prepuberty\* OR schoolchild\* OR "school age\*" OR preschool\* OR kindergar\* OR "primary school\*" OR "secondary school\*" OR "elementary school\*" OR "high school\*" OR highschool\* OR youth\*)

DE (random\*) OR TI (random\* OR placebo\* OR trial OR untreated OR sham) OR AB (random\* OR placebo\* OR trial OR untreated OR sham)

Note: "not treated" is handled as a stop word so all records with treated are retrieved.

## Cochrane Central

TI ("serotonin reuptake inhibitor\*" OR "serotonin uptake inhibitor\*" OR SSRI\* OR SRI\* OR "serotonin norepinephrine reuptake inhibitor\*" OR "serotonin norepinephrine uptake inhibitor\*" OR SNRI\* OR venlafaxin\* OR desvenlafaxin\* OR effexor OR pristiq OR milnacipran OR levomilnacipran OR fetzima OR savella OR duloxetine\* OR cymbalta OR sibutramine OR citalopram OR celexa OR escitalopram OR lexapro OR fluoxetine\* OR prozac OR sarafem OR symbyax OR fluvoxamin\* OR luvox OR paroxetine\* OR paxil OR brisdelle OR sertraline\* OR zoloft) OR AB ("serotonin reuptake inhibitor\*" OR "serotonin uptake inhibitor\*" OR SSRI\* OR SRI\* OR "serotonin norepinephrine reuptake inhibitor\*" OR "serotonin norepinephrine uptake inhibitor\*" OR SNRI\* OR venlafaxin\* OR desvenlafaxin\* OR effexor OR pristiq OR milnacipran OR levomilnacipran OR fetzima OR savella OR duloxetine\* OR cymbalta OR sibutramine OR citalopram OR celexa OR escitalopram OR lexapro OR fluoxetine\* OR prozac OR sarafem OR symbyax OR fluvoxamin\* OR luvox OR paroxetine\* OR paxil OR brisdelle OR sertraline\* OR zoloft)

TI (depression\* OR depressive OR dysthymic OR dysthymia\* OR anxiety OR "obsessive-compulsive" OR ocd OR anankastic OR phobic OR phobia\* OR panic OR "stress disorder\*" OR "post traumatic stress" OR "posttraumatic stress" OR "post traumatic symptom\*" OR "posttraumatic symptom\*" OR ptsd) OR AB (depression\* OR depressive OR dysthymic OR dysthymia\* OR anxiety OR "obsessive-compulsive" OR ocd OR anankastic OR phobic OR phobia\* OR panic OR "stress disorder\*" OR "post traumatic stress" OR "posttraumatic stress" OR "post traumatic symptom\*" OR "posttraumatic symptom\*" OR ptsd)

TI (child\* OR adolescen\* OR toddler\* OR teen\* OR boy OR boys OR girl\* OR pediatric OR paediatric OR puber\* OR pubescen\* OR prepubescen\* OR prepuberty\* OR schoolchild\* OR "school age\*" OR preschool\* OR kindergar\* OR "primary school\*" OR "secondary school\*" OR "elementary school\*" OR "high school\*" OR highschool\* OR youth\*) OR AB (child\* OR adolescen\* OR toddler\* OR teen\* OR boy OR boys OR girl\* OR pediatric OR paediatric OR puber\* OR pubescen\* OR prepubescen\* OR prepuberty\* OR schoolchild\* OR "school age\*" OR preschool\* OR kindergar\* OR "primary school\*" OR "secondary school\*" OR "elementary school\*" OR "high school\*" OR highschool\* OR youth\*)

### Web of Science

TS=("serotonin reuptake inhibitor\*" OR "serotonin uptake inhibitor\*" OR SSRI\* OR SRI\* OR "serotonin norepinephrine reuptake inhibitor\*" OR "serotonin norepinephrine uptake inhibitor\*" OR SNRI\* OR venlafaxin\* OR desvenlafaxin\* OR effexor OR pristin\* OR milnacipran OR levomilnacipran OR fetzima OR savella OR duloxetine\* OR cymbalta OR sibutramine OR citalopram OR celexa OR escitalopram OR lexapro OR fluoxetine\* OR prozac OR sarafem OR symbyax OR fluvoxamin\* OR luvox OR paroxetine\* OR paxil OR brisdelle OR sertraline\* OR zoloft)

TS=(depression\* OR depressive OR dysthymic OR dysthymia\* OR anxiety OR "obsessive-compulsive" OR ocd OR anankastic OR phobic OR phobia\* OR panic OR "stress disorder\*" OR "post traumatic stress" OR "posttraumatic stress" OR "post traumatic symptom\*" OR "posttraumatic symptom\*" OR ptsd)

TS=(child\* OR adolescen\* OR toddler\* OR teen\* OR boy OR boys OR girl\* OR pediatric OR paediatric OR puber\* OR pubescen\* OR prepubescen\* OR prepuberty\* OR schoolchild\* OR "school age\*" OR preschool\* OR kindergar\* OR "primary school\*" OR "secondary school\*" OR "elementary school\*" OR "high school\*" OR highschool\* OR youth\*)

TS=(random\* OR placebo\* OR trial OR untreated OR sham)

## eAppendix 2. Moderator Analyses

### Methods and Results for the Univariate Analyses – Continuous Variables

**Methods:** Moderator analyses were conducted for six continuous moderators (treatment duration, publication year, illness duration, age of onset, number of sites, and baseline severity) for both the combined disorders group and individual disorders groups. We examined whether specific characteristics of the studies were related to the effect sizes (i.e., drug-placebo differences) in univariate analyses. Continuous variables were analyzed with a meta-regression analysis using method-of-moments analyses in a random-effects model. The Z-statistic was used to test the significance of the slope. As various scales were used to assess baseline severity, we standardized the baseline and outcome values by dividing the mean values by the SD.

**Results:** The relationship between effect size and publication year was significant in the combined analyses ( $Z=-2.36$ ,  $p=.02$ ), as well as in the DD subgroup analyses ( $Z=-2.26$ ,  $p=.02$ ), with recently published studies yielding smaller antidepressant-placebo differences. Further, the relationship between effect size and illness duration was significant in the combined analyses ( $Z=2.89$ ,  $p=.004$ ), indicating that children with a longer duration of illness exhibit greater response to antidepressants compared to placebo. Finally, number of sites was found to be significantly correlated to effect size in the combined analyses ( $Z=-2.98$ ,  $p=.003$ ), as well as in the DD subgroup analyses ( $Z=-2.16$ ,  $p<.03$ ), and the OCD subgroup analyses ( $Z=-2.16$ ,  $p=.03$ ), with number of study sites negatively associated with magnitude of differences between antidepressants and placebo. See eTable 4 for all calculations.

### Methods and Results for the Univariate Analyses – Categorical Variables

**Methods:** Moderator analyses were conducted for four categorical moderators (placebo lead-in, comorbidity, region, and primary funding source) for both the combined disorders group and individual disorders groups. Categorical variables were analyzed using a mixed-effects model. We examined whether specific characteristics of the studies were related to the effect sizes (i.e., drug-placebo differences) in univariate analyses.

**Results:** The relationship between effect size and primary funding source was significant in the combined analyses ( $p = .02$ ), as well as in the DD subgroup analyses ( $p = .02$ ). In both cases, studies that were funded by industry yielded significantly smaller effect sizes than those that reported public sources of funding only (e.g., NIMH). See eTable 5 for further details.

### Methods and Results for the Multivariate Meta-regression Analysis

**Methods:** Given the relatively large number of moderator analyses, we decided to conduct a multivariate meta-regression. Effect sizes (i.e., dependent variable) were weighted by the sample size divided by  $s^2$  (i.e.,  $n/\text{var}$ )<sup>1</sup>. Multivariate regression analyses were conducted in SPSS (Version 21.0.0.2).

This approach is in line with the methods adopted by Cuijpers<sup>2-5</sup>. The model indicates the significance of each potential moderator while controlling for the others. To avoid collinearity among the predictors of the regression model, we first tested whether high correlations (i.e., correlations higher than 0.60) were found among the moderators that could be entered into the model. Three variables were found to have correlations higher than 0.60: the funding source correlated high with the number of sites ( $r = .698$ ), treatment duration correlated high with illness duration ( $r = 0.62$ ), and comorbidity correlated high with the number of sites ( $r = -0.75$ ). We decided to use the number of sites (not funding source or comorbidity) and illness duration (not treatment duration) as predictors in the model. All remaining variables (i.e., illness duration, publication year, baseline severity, number of sites, age of onset, placebo lead-in, and study location) were included as predictors in the model.

**Results:** None of the moderators were found to be significant in the multivariate meta-regression with weighted effect sizes. All results can be found in eTable 6.

### **eAppendix 3. Study Heterogeneity Stratified by Disorder**

OCD: The eight studies exhibited no heterogeneity ( $Q=2.28$ ,  $p=.07$ ,  $I^2=0.00$ ,  $\tau^2=0.00$ ). There was no evidence of asymmetry in a funnel plot. Neither the Begg's test nor the Egger's test yielded a significant result. The fail-safe N indicated that 43 unpublished null studies would be needed to remove the significance from the findings. The trim-and-fill method lead to a very slight adjustment of Hedges' g ( $g=0.41$ ,  $CI=0.26-0.55$ ).

DD: The seventeen studies exhibited moderate heterogeneity ( $Q=20.28$ ,  $p=.38$ ,  $I^2=6.31$ ,  $\tau^2=0.00$ ). There was some evidence of asymmetry in a funnel plot. Neither the Begg's test nor the Egger's test yielded a significant result. The fail-safe N indicated that 165 unpublished null studies would be needed to remove the significance from the findings. The trim-and-fill method did not lead to an adjustment of Hedges' g.

AD: The ten studies exhibited moderate heterogeneity ( $Q=22.93$ ,  $p=.01$ ,  $I^2=56.40$ ,  $\tau^2=0.04$ ). There was evidence of asymmetry in a funnel plot. Both the Begg's test and the Egger's test yielded a non-significant result (2-tailed  $p > .05$ ). The fail-safe N indicated that 308 unpublished null studies would be needed to remove the significance from the findings. The trim-and-fill method lead to a slight adjustment of the standard mean difference ( $g=0.53$ ,  $CI=0.36- 0.70$ ).

Across all studies: The combined analysis yielded low to moderate heterogeneity ( $Q=76.62$ ,  $p<.001$ ,  $I^2=47.79$ ,  $\tau^2=0.03$ ).

**eFigure 1.** Flow Chart

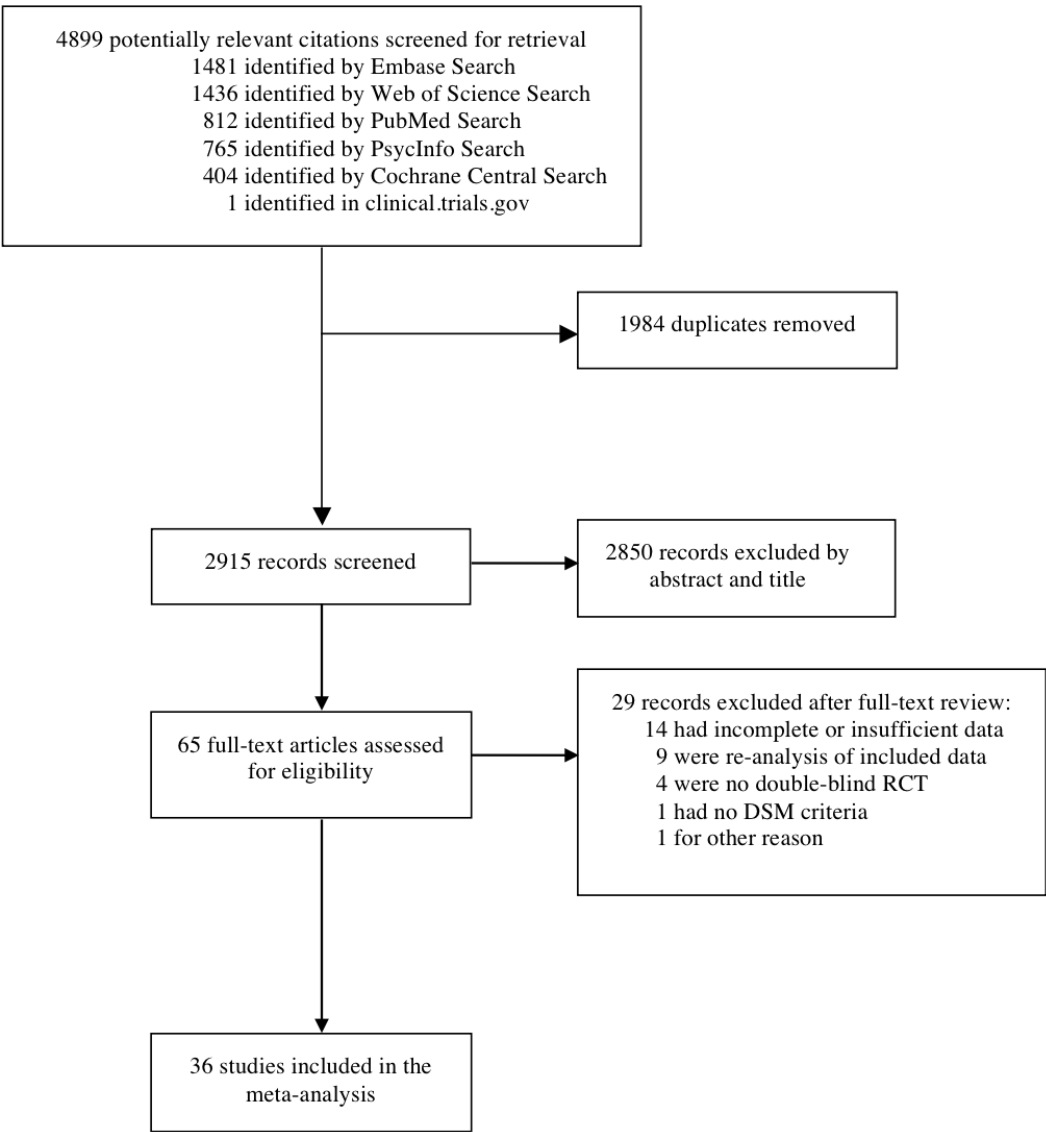

**eFigure 2.** Risk of Bias Assessment

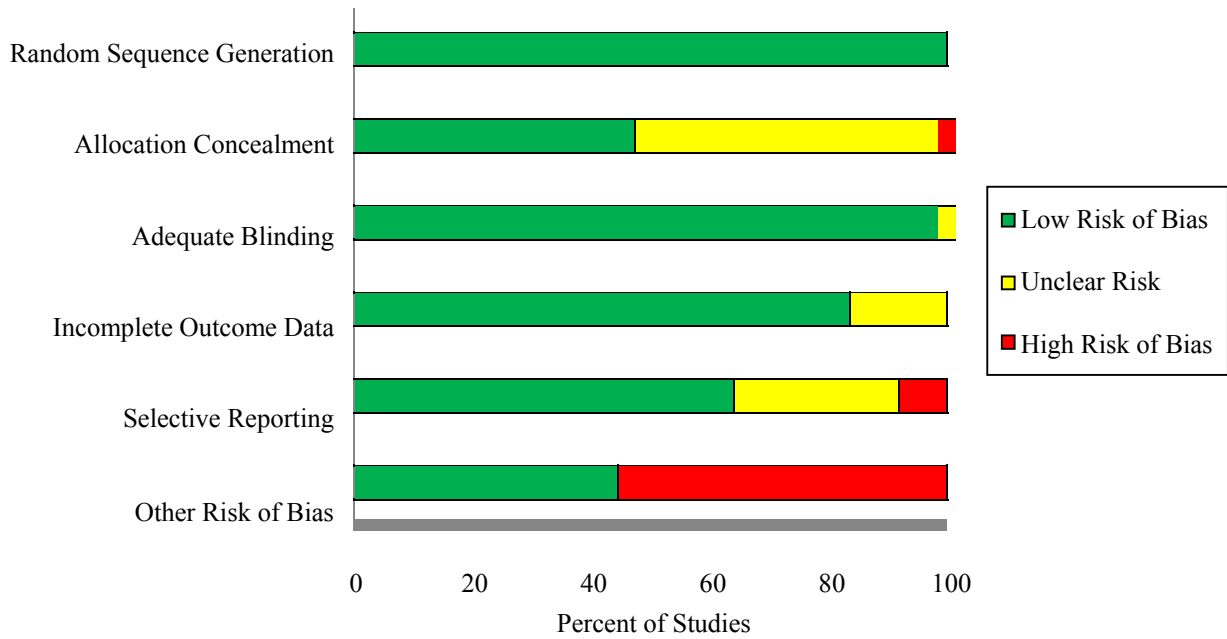

*Note:* The large amount of high risk in the “other risk of bias” category was mainly due to per protocol analysis rather than intent-to-treat analysis.



eFigure 3. Funnel Plots Stratified by Disorder

Anxiety Disorders

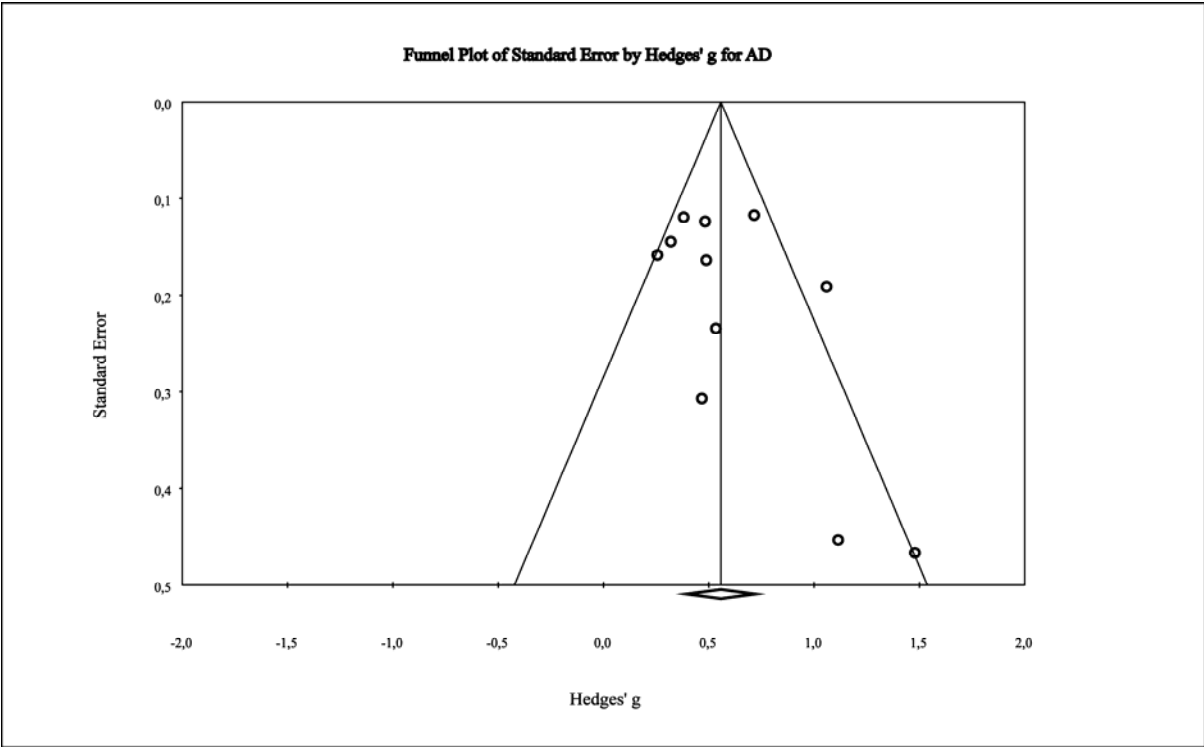

## Depressive Disorder

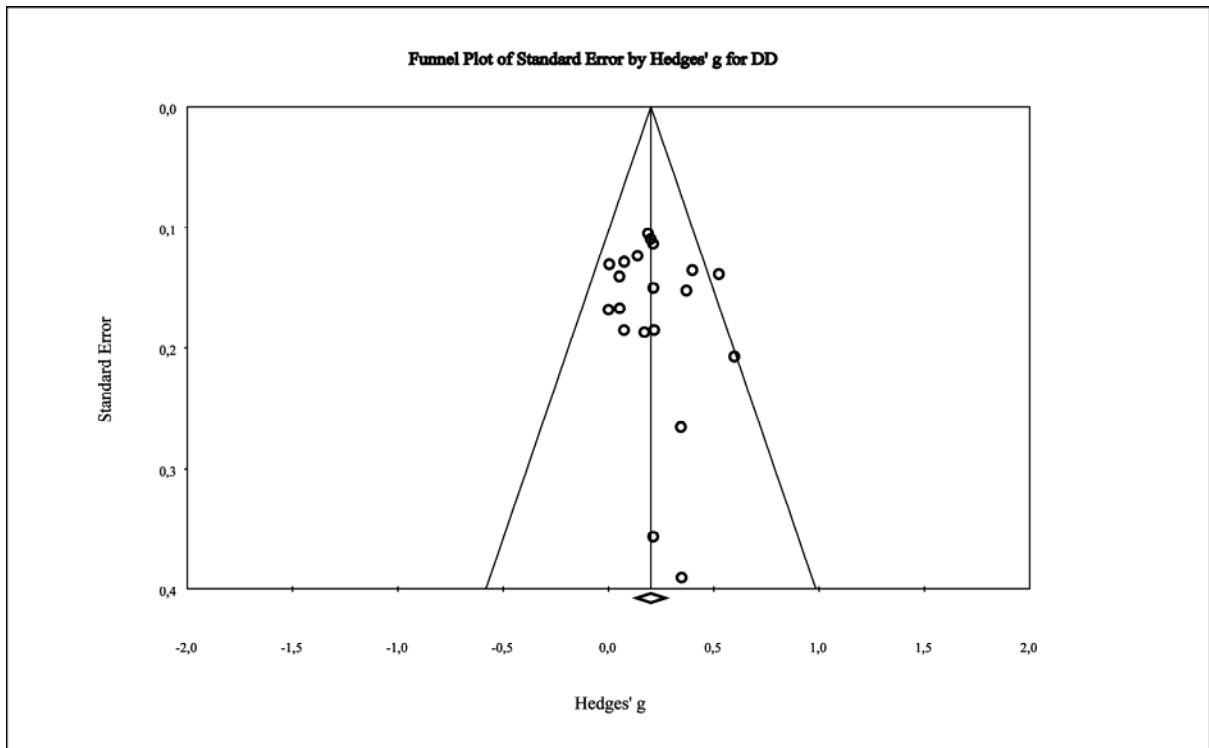

## Obsessive-Compulsive Disorder

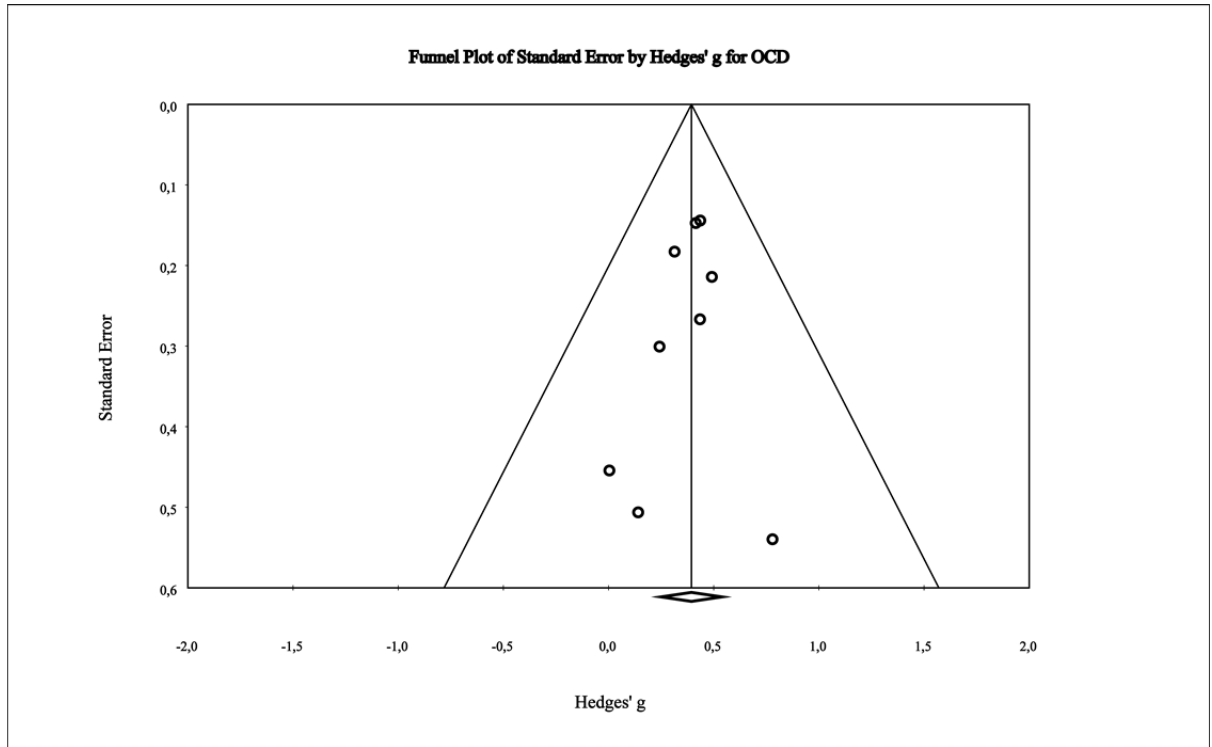

**eTable 1.** Characteristics of Included Studies

| Study                                          | Dx                 | Tx Dur, Wk | Study N <sup>c</sup> | Primary Outcome | Intervention, mg/d  | Mean Age, Y (SD)  | %F | Length of Illness, M | Age of Onset, Y (SD) | Quality <sup>k</sup> | Funding             | Location      |
|------------------------------------------------|--------------------|------------|----------------------|-----------------|---------------------|-------------------|----|----------------------|----------------------|----------------------|---------------------|---------------|
| <b>Depressive Disorder</b>                     |                    |            |                      |                 |                     |                   |    |                      |                      |                      |                     |               |
| Simeon et al, <sup>6</sup> 1990                | MDD <sup>a</sup>   | 7          | 40                   | HAM-D           | Fluoxetine 20 - 60  | 16                | 55 | NR                   | NR                   | 0.33                 | Industry            | North America |
| Emslie et al, <sup>7</sup> 1997                | MDD <sup>a,b</sup> | 8          | 96                   | CDRS-R          | Fluoxetine 20       | 12.35 (2.65)      | 46 | 18.40                | 10.80 (2.65)         | 0.78                 | Public              | North America |
| Keller et al, <sup>8</sup> 2001 <sup>d</sup>   | MDD                | 8          | 180                  | HAM-D           | Paroxetine 20 - 40  | 14.95 (1.60)      | 64 | 13.52                | 13.29 (2.56)         | 0.89                 | Industry            | North America |
| Emslie et al, <sup>9</sup> 2002                | MDD <sup>b</sup>   | 9          | 219                  | CDRS-R          | Fluoxetine 20       | 12.70 (2.57)      | 49 | 14                   | 10.33 (3.02)         | 0.89                 | Industry            | North America |
| Wagner et al, <sup>10</sup> 2003               | MDD                | 10         | 376                  | CDRS-R          | Sertraline 50 - 200 | 6-17 <sup>e</sup> | 51 | 23.07                | 10.04                | 0.78                 | Industry            | International |
| March et al, <sup>11</sup> 2004 <sup>d,h</sup> | MDD                | 12         | 328                  | CDRS-R          | Fluoxetine 10 - 40  | 14.60 (1.5)       | 55 | 40                   | NR                   | 1.00                 | Public <sup>i</sup> | North America |
| Wagner et al, <sup>12</sup> 2004a              | MDD                | 8          | 178                  | CDRS-R          | Citalopram 20 - 40  | 12.10 (2.95)      | 63 | 27                   | 9.80 (3.15)          | 0.78                 | Industry            | North America |
| Berard et al, <sup>13</sup> 2006               | MDD                | 12         | 286                  | MADRS           | Paroxetine 20 - 40  | 15.60 (1.60)      | 67 | NR                   | NR                   | 0.89                 | Industry            | International |
| Emslie et al, <sup>14</sup> 2006               | MDD <sup>a</sup>   | 8          | 206                  | CDRS-R          | Paroxetine 10 - 50  | 12.00 (2.97)      | 47 | 25.90                | 9.80 (3.30)          | 0.78                 | Industry            | North America |
| von Knorring et al, <sup>15</sup> 2006         | MDD                | 12         | 244                  | K-SADS-P        | Citalopram 10 - 40  | 16 (1.00)         | NR | NR                   | NR                   | 0.44                 | Industry            | Europe        |

**eTable 1.** Characteristics of Included Studies (cont.)

| Study                                       | Dx                          | Tx Dur, Wk | Study N <sup>c</sup> | Primary Outcome | Intervention, mg/d                              | Mean Age, Y (SD) | %F | Length of Illness, M | Age of Onset, Y (SD) | Quality <sup>k</sup> | Funding  | Location       |
|---------------------------------------------|-----------------------------|------------|----------------------|-----------------|-------------------------------------------------|------------------|----|----------------------|----------------------|----------------------|----------|----------------|
| Wagner et al, <sup>16</sup> 2006            | MDD                         | 8          | 268                  | CDRS-R          | Escitalopram 10 - 20                            | 12.30 (3.00)     | 52 | 25.80                | 10.15 (3.25)         | 0.67                 | Industry | North America  |
| Emslie et al, <sup>17</sup> 2007            | MDD                         | 8          | 367                  | CDRS-R          | Venlafaxine ER 37.50 - 225                      | 12.25 (2.60)     | 46 | 21.13                | NR                   | 0.78                 | Industry | North America  |
| Emslie et al, <sup>18</sup> 2009            | MDD                         | 8          | 316                  | CDRS-R          | Escitalopram 10 - 20                            | 14.60 (1.55)     | 59 | 16.10                | 12.35 (2.55)         | 0.67                 | Industry | North America  |
| Findling et al, <sup>19</sup> 2009          | MDD, Dys-thymia, DDNOS, SUD | 8          | 34                   | CDRS-R          | Fluoxetine 10 - 20                              | 16.46 (1.08)     | 15 | 49.04                | 11.41 (2.50)         | 0.89                 | Industry | North America  |
| PIR-112487, <sup>20</sup> 2011 <sup>j</sup> | MDD <sup>b</sup>            | 8          | 56                   | CDRS-R          | Paroxetine 10 - 40                              | 14.59 (2.33)     | 61 | NR                   | NR                   | 0.56                 | Industry | Asia           |
| Atkinson et al, <sup>21</sup> 2014          | MDD <sup>a, b</sup>         | 10         | 337                  | CDRS-R          | Duloxetine 60 - 120<br>Fluoxetine 20 - 40       | 13.20 (3.14)     | 52 | NR                   | 11.60                | 0.89                 | Industry | Inter-national |
| Emslie et al, <sup>22</sup> 2014            | MDD <sup>a, b</sup>         | 10         | 463                  | CDRS-R          | Duloxetine 60<br>Duloxetine 30<br>Fluoxetine 20 | 12.98 (2.98)     | 51 | NR                   | NR                   | 0.78                 | Industry | Inter-national |

**eTable 1.** Characteristics of Included Studies (cont.)

| Study                                            | Dx                      | Tx Dur, Wk | Study N <sup>c</sup> | Primary Outcome      | Intervention, mg/d         | Mean Age, Y (SD) | %F | Length of Illness, M | Age of Onset, Y (SD) | Quality <sup>k</sup> | Funding             | Location      |
|--------------------------------------------------|-------------------------|------------|----------------------|----------------------|----------------------------|------------------|----|----------------------|----------------------|----------------------|---------------------|---------------|
| <b>Anxiety Disorder</b>                          |                         |            |                      |                      |                            |                  |    |                      |                      |                      |                     |               |
| RUPP, <sup>23</sup> 2001                         | SP, SAD, GAD            | 8          | 128                  | PARS                 | Fluvoxamine 50 - 300       | 10.30 (2.95)     | 49 | NR                   | NR                   | 0.67                 | Public / Industry   | North America |
| Rynn et al, <sup>24</sup> 2001                   | GAD                     | 9          | 22                   | HAM-A                | Sertraline 25 - 50         | 11.70 (3.90)     | 23 | >12                  | NR                   | 0.67                 | Public              | North America |
| Birmaher et al, <sup>25</sup> 2003               | SAD, SP, GAD, SM PH, PD | 12         | 74                   | PARS <sup>f</sup>    | Fluoxetine 10 - 20         | 11.80 (2.80)     | 54 | 62.70                | NR                   | 0.78                 | Public <sup>i</sup> | North America |
| Wagner et al, <sup>26</sup> 2004b                | SP                      | 16         | 322                  | LSAS-CA <sup>f</sup> | Paroxetine 10 - 50         | 13.10 (2.77)     | 49 | NR                   | NR                   | 0.89                 | Industry            | International |
| March et al, <sup>27</sup> 2007                  | SP                      | 16         | 293                  | SAS-CA               | Venlafaxine ER 37.50 - 225 | 13.60 (2.55)     | 57 | 58                   | NR                   | 1.00                 | Industry            | North America |
| Rynn et al, <sup>28</sup> 2007 <sup>g</sup>      | GAD                     | 8          | 323                  | K-SADS-GA            | Venlafaxine 37.50 - 225    | 11.30 (2.86)     | 41 | 39.12                | NR                   | 0.78                 | Industry            | North America |
| Walkup et al, <sup>29</sup> 2008 <sup>d, h</sup> | SAD, GAD, SP            | 12         | 349                  | PARS                 | Sertraline 25 - 200        | 10.70 (2.80)     | 50 | NR                   | NR                   | 1.00                 | Public <sup>i</sup> | North America |
| da Costa et al, <sup>30</sup> 2013 <sup>d</sup>  | GAD, SAD, SP            | 12         | 21                   | MASC <sup>f</sup>    | Fluoxetine 10 - 60         | 11.50            | 48 | NR                   | NR                   | 0.56                 | Public              | South America |
| Strawn et al, <sup>31</sup> 2015                 | GAD                     | 10         | 272                  | PARS                 | Duloxetine 30 - 120        | 12.40 (2.95)     | 53 | 52.20                | NR                   | 1.00                 | Public / Industry   | International |
| Melvin et al, <sup>32</sup> 2016                 | SP, PH, GAD, SAD, PD    | 10         | 42                   | RCMAS <sup>f</sup>   | Fluoxetine + CBT 10 - 60   | 13.60 (1)        | 45 | NR                   | NR                   | 0.89                 | Public <sup>i</sup> | Australia     |

**eTable 1.** Characteristics of Included Studies (cont.)

| Study                                            | Dx  | Tx Dur, Wk | Study N <sup>c</sup> | Primary Outcome      | Intervention, mg/d                                         | Mean Age, Y (SD)          | %F | Length of Illness, M | Age of Onset, Y (SD) | Quality <sup>k</sup> | Funding             | Location      |
|--------------------------------------------------|-----|------------|----------------------|----------------------|------------------------------------------------------------|---------------------------|----|----------------------|----------------------|----------------------|---------------------|---------------|
| <b>Obsessive-Compulsive Disorder</b>             |     |            |                      |                      |                                                            |                           |    |                      |                      |                      |                     |               |
| Riddle et al, <sup>33</sup> 1992                 | OCD | 8          | 14                   | CY-BOCS <sup>f</sup> | Fluoxetine 20                                              | 11.80 (2.30)              | 57 | NR                   | NR                   | 0.44                 | Public <sup>i</sup> | North America |
| March et al, <sup>34</sup> 1998                  | OCD | 12         | 189                  | CY-BOCS <sup>f</sup> | Sertraline 25 - 200                                        | 12.60 (6-17) <sup>e</sup> | NR | 45.60                | NR                   | 0.78                 | Industry            | North America |
| Geller et al, <sup>35</sup> 2001                 | OCD | 13         | 103                  | CY-BOCS              | Fluoxetine 20 - 60                                         | 11.40 (2.90)              | 37 | >6                   | NR                   | 0.89                 | Industry            | North America |
| Riddle et al, <sup>36</sup> 2001 <sup>d</sup>    | OCD | 10         | 120                  | CY-BOCS              | Fluvoxamine 50 - 200                                       | 13.03                     | 47 | 43.20                | NR                   | 0.67                 | Industry            | North America |
| Liebowitz et al, <sup>37</sup> 2002 <sup>d</sup> | OCD | 8          | 43                   | CY-BOCS              | Fluoxetine 20 - 80                                         | 12.65 (2.19)              | 42 | ≥12                  | NR                   | 1.00                 | Public / Industry   | North America |
| POTS, <sup>38</sup> 2004 <sup>h</sup>            | OCD | 12         | 84                   | CY-BOCS              | Sertraline 25-200                                          | 12 (2.70)                 | 45 | NR                   | NR                   | 1.00                 | Public <sup>i</sup> | North America |
| Geller et al, <sup>39</sup> 2004                 | OCD | 10         | 207                  | CY-BOCS              | Paroxetine 10 - 50                                         | 11.30 (3.00)              | 42 | 50.40                | 7.50 (3.09)          | 1.00                 | Industry            | North America |
| Storch et al, <sup>40</sup> 2013                 | OCD | 18         | 47                   | CY-BOCS              | Sertraline (Reg) + CBT<br>Sertraline (Slow) + CBT 25 - 200 | 11.90 (3.47)              | 38 | NR                   | NR                   | 0.67                 | Public <sup>i</sup> | North America |

**eTable 1.** Characteristics of Included Studies (cont.)

| Study                                | Dx   | Tx Dur, Wk | Study N <sup>c</sup> | Primary Outcome | Intervention, mg/d  | Mean Age, Y (SD) | Female % | Length of Illness, M | Age of Onset, Y (SD) | Quality <sup>k</sup> | Funding  | Location      |
|--------------------------------------|------|------------|----------------------|-----------------|---------------------|------------------|----------|----------------------|----------------------|----------------------|----------|---------------|
| <b>Posttraumatic Stress Disorder</b> |      |            |                      |                 |                     |                  |          |                      |                      |                      |          |               |
| Robb et al, <sup>41</sup> 2010       | PTSD | 10         | 131                  | UCLA-PTSD       | Sertraline 50 - 200 | 10.98 (1.75)     | 60       | 29.40                | NR                   | 0.78                 | Industry | North America |

Abbreviations: DDNOS, Depressive Disorder Not Otherwise Specified; Dx, diagnosis; GAD, Generalized Anxiety Disorder; M, months; MDD, Major Depressive Disorder; NR, not reported; OCD, Obsessive Compulsive Disorder; PD, Panic Disorder; PH, Specific Phobia; SAD, Separation Anxiety Disorder; SD, Standard Deviation; SM, Selective Mutism; SP, Social Phobia; SUD, Substance Use Disorder; Tx Dur, treatment duration; Wk, weeks; Y, years.

<sup>a</sup> Without psychotic features.

<sup>b</sup> Single episode or recurrent.

<sup>c</sup> N included in our analysis. Some studies included additional arms (i.e., tricyclic antidepressant, CBT alone, etc.) that were not extracted.

<sup>d</sup> Only SSRI or SNRI treatment arms from acute treatment phase / pre-crossover phase extracted as per protocol.

<sup>e</sup> Range. Mean (SD) not available.

<sup>f</sup> Primary outcome not specified or data not usable; most common measure for which data was available was chosen.

<sup>g</sup> Two trials. Analyses broken down by study.

<sup>h</sup> Additional arm (antidepressant + CBT) was not extracted.

<sup>i</sup> Study medication and matching placebo provided by the drug manufacturer.

<sup>j</sup> Unpublished Study.

<sup>k</sup> Based on adequacy of random sequence generation, allocation concealment, blinding of participants and personnel, blinding of outcome assessment, usage of observer-rated outcomes, completeness of outcome data, specification of main outcomes a priori, reporting on all outcomes, and conduction of ITT-analyses. Individual items were summed and divided by the total number of applicable items to produce a total score ranging from 0 to 1, where higher scores denote greater methodological quality.



**eTable 2.** Study Heterogeneity

| <b>Drug</b>                    | <b>Treatment Arms</b> | <b>Hedges g</b> | <b>95% CI</b> | <b>SE</b> | <b>p-Value</b> | <b>Q-value</b>   | <b>p-Value</b>   | <b>I<sup>2</sup></b> | <b>Ta</b>        |
|--------------------------------|-----------------------|-----------------|---------------|-----------|----------------|------------------|------------------|----------------------|------------------|
| <b>Stratified Between Drug</b> |                       |                 |               |           |                |                  |                  |                      |                  |
| Citalopram                     | 2                     | 0.18            | -0.18 - 0.54  | 0.18      | .33            | N/A <sup>a</sup> | N/A <sup>a</sup> | N/A <sup>a</sup>     | N/A <sup>a</sup> |
| Escitalopram                   | 2                     | 0.18            | 0.01 - 0.34   | 0.08      | .03            | N/A <sup>a</sup> | N/A <sup>a</sup> | N/A <sup>a</sup>     | N/A <sup>a</sup> |
| Fluoxetine                     | 13                    | 0.38            | 0.26 - 0.51   | 0.06      | <0.001         | 13.17            | .36              | 8.90                 | 0.01             |
| Fluvoxamine                    | 2                     | 0.68            | -0.05 - 1.41  | 0.37      | .07            | N/A <sup>a</sup> | N/A <sup>a</sup> | N/A <sup>a</sup>     | N/A <sup>a</sup> |
| Paroxetine                     | 6                     | 0.31            | 0.07 - 0.54   | 0.12      | .01            | 19.83            | .001             | 74.78                | 0.06             |
| Sertraline                     | 8                     | 0.31            | 0.15 - 0.47   | 0.08      | <.001          | 9.38             | .23              | 25.37                | 0.01             |
| Venlafaxine                    | 4                     | 0.31            | 0.18 - 0.44   | 0.07      | <.001          | 2.66             | .45              | 0.00                 | 0.00             |
| Duloxetine                     | 4                     | 0.24            | 0.06 - 0.46   | 0.16      | .04            | 5.91             | .12              | 49.20                | 0.03             |
| <b>Stratified Within Drug</b>  |                       |                 |               |           |                |                  |                  |                      |                  |
| Citalopram                     | 2                     | 1.78            | 1.56 - 2.04   | 0.12      | <.001          | N/A <sup>a</sup> | N/A <sup>a</sup> | N/A <sup>a</sup>     | N/A <sup>a</sup> |
| Escitalopram                   | 2                     | 1.68            | 1.48 - 1.87   | 0.10      | <.001          | N/A <sup>a</sup> | N/A <sup>a</sup> | N/A <sup>a</sup>     | N/A <sup>a</sup> |
| Fluoxetine                     | 13                    | 1.73            | 1.32 - 2.13   | 0.21      | <.001          | 100.36           | <.001            | 88.05                | 0.45             |
| Fluvoxamine                    | 2                     | 1.22            | 0.41 - 2.02   | 0.41      | .003           | N/A <sup>a</sup> | N/A <sup>a</sup> | N/A <sup>a</sup>     | N/A <sup>a</sup> |
| Paroxetine                     | 6                     | 1.46            | 1.31 - 1.61   | 0.08      | <.001          | 7.19             | .21              | 30.45                | 0.01             |
| Sertraline                     | 8                     | 1.38            | 1.02-1.73     | 0.18      | <.001          | 37.54            | <.001            | 81.35                | 0.18             |
| Venlafaxine                    | 4                     | 1.77            | 1.59-1.95     | 0.09      | <.001          | 3.71             | .29              | 19.15                | 0.01             |
| Duloxetine                     | 4                     | 1.95            | 1.73-2.18     | 0.11      | <.001          | 5.17             | .16              | 41.97                | 0.02             |

<sup>a</sup>Heterogeneity was not assessed due to the low number of studies.

**eTable 3.** Adverse Events

| <b>eTable 3a. Mean Percentages and Numbers of TEAEs</b> |                                       |                             |                                |                                       |                         |                            |
|---------------------------------------------------------|---------------------------------------|-----------------------------|--------------------------------|---------------------------------------|-------------------------|----------------------------|
| <b>Intervention</b>                                     | <b>Reporting Method 1<sup>a</sup></b> |                             |                                | <b>Reporting Method 2<sup>b</sup></b> |                         |                            |
|                                                         | <b>No. Trials</b>                     | <b>Mean Percentage Drug</b> | <b>Mean Percentage Placebo</b> | <b>No. Trials</b>                     | <b>Mean Number Drug</b> | <b>Mean Number Placebo</b> |
| SSRI vs. Placebo                                        | 19                                    | 66.89%                      | 56.84%                         | 24                                    | 0.14                    | 0.09                       |
| SNRI vs. Placebo                                        | 7                                     | 62.09%                      | 57.99%                         | 2                                     | 0.13                    | 0.09                       |

<sup>a</sup>Percent of patients reporting TEAEs.

<sup>b</sup>Mean number of TEAEs per patient across all reported symptoms.

| <b>eTable 3b. Mean Percentages of Discontinuation of Study due to TEAEs and SAEs and Mean Percentages of SAEs</b> |                                    |                             |                                |                         |                             |                                |
|-------------------------------------------------------------------------------------------------------------------|------------------------------------|-----------------------------|--------------------------------|-------------------------|-----------------------------|--------------------------------|
| <b>Intervention</b>                                                                                               | <b>Discontinuation<sup>c</sup></b> |                             |                                | <b>SAEs<sup>d</sup></b> |                             |                                |
|                                                                                                                   | <b>No. Trials</b>                  | <b>Mean Percentage Drug</b> | <b>Mean Percentage Placebo</b> | <b>No. Trials</b>       | <b>Mean Percentage Drug</b> | <b>Mean Percentage Placebo</b> |
| SSRI vs. Placebo                                                                                                  | 27                                 | 6.83%                       | 3.46%                          | 17                      | 6.24%                       | 3.42%                          |
| SNRI vs. Placebo                                                                                                  | 6                                  | 6.80%                       | 3.62%                          | 7                       | 4.75%                       | 2.17%                          |

<sup>c</sup>Percent of patients who discontinued the study due to TEAEs and SAEs.

<sup>d</sup>Percent of patients reporting SAEs.

| <b>eTable 4. Continuous Univariate Moderator Analyses</b> |                         |                |
|-----------------------------------------------------------|-------------------------|----------------|
| <b>Moderator</b>                                          | <b>Z-Value</b>          | <b>p-Value</b> |
| <b>Overall</b>                                            |                         |                |
| Treatment Duration                                        | 0.57                    | .57            |
| Publication Year                                          | -2.36                   | .02            |
| Baseline Severity                                         | 0.20                    | .84            |
| Number of Sites                                           | -2.98                   | .003           |
| Illness Duration                                          | 2.89                    | .004           |
| Age of Onset                                              | -1.11                   | .27            |
| <b>Depressive Disorders</b>                               |                         |                |
| Treatment Duration                                        | -1.12                   | .26            |
| Publication Year                                          | -2.26                   | .02            |
| Baseline Severity                                         | 1.21                    | .23            |
| Number of Sites                                           | -2.16                   | .03            |
| Illness Duration                                          | -0.01                   | 1.00           |
| Age of Onset                                              | -0.31                   | .76            |
| <b>Obsessive-Compulsive Disorder</b>                      |                         |                |
| Treatment Duration                                        | -0.47                   | .64            |
| Publication Year                                          | -0.88                   | .38            |
| Baseline Severity                                         | -0.33                   | .74            |
| Number of Sites                                           | -0.50                   | .62            |
| Illness Duration                                          | 0.45                    | .65            |
| Age of Onset                                              | <i>N/A</i> <sup>a</sup> |                |
| <b>Anxiety Disorders</b>                                  |                         |                |
| Treatment Duration                                        | -0.55                   | .58            |
| Publication Year                                          | -1.90                   | .06            |
| Baseline Severity                                         | -1.18                   | .24            |
| Number of Sites                                           | -1.84                   | .07            |
| Illness Duration                                          | 1.62                    | .11            |
| Age of Onset                                              | <i>N/A</i> <sup>b</sup> |                |
| <sup>a</sup> Only 1 Study                                 |                         |                |
| <sup>b</sup> No Studies                                   |                         |                |

**eTable 5.** Categorical Univariate Moderator Analyses

| Moderator                            | Number of included studies | Hedges g | 95% CI       | Q-value | I <sup>2</sup> | p-Value          |
|--------------------------------------|----------------------------|----------|--------------|---------|----------------|------------------|
| <b>Overall</b>                       |                            |          |              |         |                |                  |
| Placebo lead-in                      |                            |          |              | 0.23    |                | .63              |
| No                                   | 28                         | 0.35     | 0.25 - 0.46  |         | 64.30          |                  |
| Yes                                  | 13                         | 0.31     | 0.17 - 0.45  |         | 8.66           |                  |
| Comorbidity                          |                            |          |              | 2.47    |                | .12              |
| No                                   | 6                          | 0.24     | 0.04 - 0.43  |         | 29.90          |                  |
| Yes                                  | 28                         | 0.41     | 0.31 - 0.51  |         | 60.61          |                  |
| Study location                       |                            |          |              | 1.94    |                | .16              |
| US only                              | 27                         | 0.38     | 0.28 - 0.48  |         | 50.10          |                  |
| Not US only                          | 14                         | 0.26     | 0.13 - 0.39  |         | 62.97          |                  |
| Primary funding source               |                            |          |              | 5.42    |                | .02 <sup>a</sup> |
| Industry only                        | 27                         | 0.26     | 0.19 - 0.33  |         | 37.91          |                  |
| Public only                          | 11                         | 0.48     | 0.31 - 0.64  |         | 2.97           |                  |
| <b>Depressive Disorders</b>          |                            |          |              |         |                |                  |
| Placebo lead-in                      |                            |          |              | 2.71    |                | .10              |
| No                                   | 11                         | 0.15     | 0.06 - 0.24  |         | 0.00           |                  |
| Yes                                  | 9                          | 0.26     | 0.16 - 0.35  |         | 23.51          |                  |
| Comorbidity                          |                            |          |              | 1.98    |                | .16              |
| No                                   | 3                          | 0.12     | -0.04 - 0.28 |         | 0.00           |                  |
| Yes                                  | 11                         | 0.25     | 0.16 - 0.35  |         | 27.54          |                  |
| Study location                       |                            |          |              | 2.61    |                | .11              |
| US only                              | 10                         | 0.25     | 0.16 - 0.35  |         | 15.15          |                  |
| Not US only                          | 10                         | 0.15     | 0.05 - 0.24  |         | 0.00           |                  |
| Primary funding source               |                            |          |              | 5.64    |                | .02 <sup>a</sup> |
| Industry only                        | 18                         | 0.18     | 0.11 - 0.25  |         | 0.00           |                  |
| Public only                          | 2                          | 0.46     | 0.24 - 0.68  |         | 0.00           |                  |
| <b>Obsessive-Compulsive Disorder</b> |                            |          |              |         |                |                  |
| Placebo lead-in                      |                            |          |              | 0.05    |                | .83              |
| No                                   | 7                          | 0.41     | 0.22 - 0.60  |         | 0.00           |                  |
| Yes                                  | 2                          | 0.38     | 0.15 - 0.60  |         | 0.00           |                  |
| Comorbidity                          | N/A <sup>b</sup>           |          |              |         |                |                  |
| Study location                       | N/A <sup>b</sup>           |          |              |         |                |                  |
| Primary funding source               |                            |          |              | 0.07    |                | .79              |
| Industry only                        | 4                          | 0.41     | 0.25 - 0.58  |         | 0.00           |                  |
| Public only                          | 4                          | 0.36     | -0.03 - 0.74 |         | 0.00           |                  |
| <b>Anxiety Disorders</b>             |                            |          |              |         |                |                  |
| Placebo lead-in                      |                            |          |              | 1.69    |                | .19              |
| No                                   | 9                          | 0.69     | 0.47 - 0.91  |         | 71.87          |                  |
| Yes                                  | 2                          | 0.37     | -0.06 - 0.80 |         | 4.13           |                  |
| Comorbidity                          |                            |          |              | 3.32    |                | 0.07             |
| No                                   | 3                          | 0.37     | 0.06 - 0.69  |         | 0.00           |                  |
| Yes                                  | 8                          | 0.74     | 0.51 - 0.97  |         | 71.38          |                  |
| Study location                       |                            |          |              | 0.00    |                | 0.96             |
| US only                              | 7                          | 0.62     | 0.37 - 0.88  |         | 78.68          |                  |
| Not US only                          | 4                          | 0.63     | 0.28 - 0.99  |         | 9.85           |                  |
| Primary funding source               |                            |          |              | 0.31    |                | 0.58             |
| Industry only                        | 4                          | 0.47     | 0.24 - 0.70  |         | 55.44          |                  |
| Public only                          | 5                          | 0.57     | 0.28 - 0.87  |         | 48.85          |                  |

<sup>a</sup>Significant at p<0.05 level

<sup>b</sup>Not enough variance

**eTable 6.** Multivariate Meta-regression Analyses

|                   | <b>Standardized<br/>Beta</b> | <b>p-Value</b> |
|-------------------|------------------------------|----------------|
| Placebo lead-in   | -1.02                        | .90            |
| Study location    | 0.63                         | .59            |
| Illness Duration  | -1.23                        | .52            |
| Publication Year  | 0.47                         | .73            |
| Age of Onset      | -1.07                        | .50            |
| Number of Sites   | -0.58                        | .70            |
| Baseline Severity | 0.14                         | .85            |

## eReferences

1. Lipsey MW, Wilson DB. Practical meta-analysis: Sage publications Thousand Oaks, CA; 2001.
2. Cuijpers P, van Straten A, Warmerdam L, Smits N. Characteristics of effective psychological treatment of depression: a metaregression analysis. *Psychother Res*. 2008;18(2):225-36.
3. Cuijpers P, van Straten A, Bohlmeijer E, Hollon SD, Andersson G. The effects of psychotherapy for adult depression are overestimated: a meta-analysis of study quality and effect size. *Psycholog Med*. 2010;40:211-23.
4. Cuijpers P, Huibers M, Ebert DD, Koole SL. How much psychotherapy is needed to treat depression? A metaregression analysis. *J Affect Disord*. 2013;149:1-13.
5. Cuijpers P, Sijbrandij M, Koole SL, Andersson G, Beekman AT, Reynolds CFI. The efficacy of psychotherapy and pharmacotherapy in treating depressive and anxiety disorders: a meta-analysis of direct comparisons. *World Psychiatry*. 2013;12:137-48.
6. Simeon JG, Dinicola VF, Ferguson HB, Copping W. Adolescent depression: a placebo-controlled fluoxetine treatment study and follow-up. *Prog Neuropsychopharmacol Biol Psychiatry*. 1990;14(5):791-795.
7. Emslie GJ, Rush AJ, Weinberg WA, Kowatch RA, Hughes CW, Carmody T. A double-blind placebo controlled trial of fluoxetine in depressed children and adolescents. *Arch Gen Psychiatry*. 1997 Nov;54(11):1031-7.
8. Keller MB, Ryan ND, Strober M, et al. Efficacy of paroxetine in the treatment of adolescent major depression: a randomized, controlled trial. *J Am Acad Child Adolesc Psychiatry*. 2001;40(7):762-772.
9. Emslie GJ, Heiligenstein JH, Wagner KD, et al. Fluoxetine for acute treatment of depression in children and adolescents: a placebo-controlled, randomized clinical trial. *J Am Acad Child Adolesc Psychiatry*. 2002;41(10):1205-1215.
10. Wagner KD, Ambrosini P, Rynn M, et al. Efficacy of sertraline in the treatment of children and adolescents with major depressive disorder: two randomized controlled trials. *JAMA*. 2003;290(8):1033-1041.
11. March J, Silva S, Petrycki S, et al. Fluoxetine, cognitive-behavioral therapy, and their combination for adolescents with depression - Treatment for adolescents with depression study (TADS) randomized controlled trial. *JAMA*. 2004;292(7):807-820.
12. Wagner KD, Robb AS, Findling RL, Jin J, Gutierrez MM, Heydorn WE. A randomized, placebo-controlled trial of citalopram for the treatment of major depression in children and adolescents. *Am J Psychiatry*. 2004;161(6):1079-1083.
13. Berard R, Fong R, Carpenter DJ, Thomason C, Wilkinson C. An international, multicenter, placebo-controlled trial of paroxetine in adolescents with major depressive disorder. *J Child Adolesc Psychopharmacol*. 2006;16(1-2):59-75.
14. Emslie GJ, Wagner KD, Kutcher S, et al. Paroxetine treatment in children and adolescents with major depressive disorder: a randomized, multicenter, double-blind, placebo-controlled trial. *J Am Acad Child Adolesc Psychiatry*. 2006;45(6):709-719.
15. von Knorring AL, Olsson GI, Thomsen PH, Lemming OM, Hultén A. A randomized, double-blind, placebo-controlled study of citalopram in adolescents with major depressive disorder. *J Clin Psychopharmacol*. 2006;26(3):311-315.
16. Wagner KD, Jonas J, Findling RL, Ventura D, Saikali K. A double-blind, randomized, placebo-controlled trial of escitalopram in the treatment of pediatric depression. *J Am Acad Child Adolesc Psychiatry*. 2006;45(3):280-288.
17. Emslie GJ, Findling RL, Yeung PP, Kunz NR, Li Y. Venlafaxine ER for the treatment of pediatric subjects with depression: results of two placebo-controlled trials. *J Am Acad Child Adolesc Psychiatry*. 2007;46(4):479-488.
18. Emslie GJ, Ventura D, Korotzer A, Tourkodimitris S. Escitalopram in the treatment of adolescent depression: a randomized placebo-controlled multisite trial. *J Am Acad Child Adolesc Psychiatry*. 2009;48(7):721-729.
19. Findling RL, Pagano ME, McNamara NK, et al. The short-term safety and efficacy of fluoxetine in depressed adolescents with alcohol and cannabis use disorders: a pilot randomized placebo-controlled trial. *Child Adolesc Psychiatry Ment Health*. 2009;3(1):11.
20. PIR112487. A randomized, double-blind, placebo controlled, parallel group, flexible dose study to evaluate the efficacy and safety of Paxil® Tablets in children and adolescents with major depressive disorder. Japan: GlaxoSmithKline; 2011. p. 4.
21. Atkinson SD, Prakash A, Zhang Q, et al. A double-blind efficacy and safety study of duloxetine flexible dosing in children and adolescents with major depressive disorder. *J Child Adolesc Psychopharmacol*. 2014;24(4):180-189.
22. Emslie GJ, Prakash A, Zhang Q, Pangallo BA, Bangs ME, March JS. A double-blind efficacy and safety study of duloxetine fixed doses in children and adolescents with major depressive disorder. *J Child Adolesc Psychopharmacol*. 2014;24(4):170-179.

23. Fluvoxamine for the treatment of anxiety disorders in children and adolescents. The Research Unit on Pediatric Psychopharmacology Anxiety Study Group. *N Engl J Med*. 2001;344(17):1279-1285.
24. Rynn MA, Siqueland L, Rickels K. Placebo-controlled trial of sertraline in the treatment of children with generalized anxiety disorder. *Am J Psychiatry*. 2001;158(12):2008-2014.
25. Birmaher B, Axelson DA, Monk K, et al. Fluoxetine for the treatment of childhood anxiety disorders. *J Am Acad Child Adolesc Psychiatry*. 2003;42(4):415-423.
26. Wagner KD, Berard R, Stein MB, et al. A multicenter, randomized, double-blind, placebo-controlled trial of paroxetine in children and adolescents with social anxiety disorder. *Arch Gen Psychiatry*. 2004;61(11):1153-1162.
27. March JS, Entusah AR, Rynn M, Albano AM, Tourian KA. A Randomized controlled trial of venlafaxine ER versus placebo in pediatric social anxiety disorder. *Biol Psychiatry*. 2007;62(10):1149-1154.
28. Rynn MA, Riddle MA, Yeung PP, Kunz NR. Efficacy and safety of extended-release venlafaxine in the treatment of generalized anxiety disorder in children and adolescents: two placebo-controlled trials. *Am J Psychiatry*. 2007;164(2):290-300.
29. Walkup JT, Albano AM, Piacentini J, et al. Cognitive behavioral therapy, sertraline, or a combination in childhood anxiety. *N Engl J Med*. 2008;359(26):2753-2766.
30. da Costa CZ, de Moraes RM, Zanetta DM, et al. Comparison among clomipramine, fluoxetine, and placebo for the treatment of anxiety disorders in children and adolescents. *J Child Adolesc Psychopharmacol*. 2013;23(10):687-692.
31. Strawn JR, Prakash A, Zhang Q, et al. A randomized, placebo-controlled study of duloxetine for the treatment of children and adolescents with generalized anxiety disorder. *J Am Acad Child Adolesc Psychiatry*. 2015;54(4):283-293.
32. Melvin GA, Dudley AL, Gordon MS, et al. Augmenting cognitive behavior therapy for school refusal with fluoxetine: A randomized controlled trial. *Child Psychiatry Hum Dev*. 2016;48(3):1-13.
33. Riddle MA, Scahill L, King RA, et al. Double-blind, crossover trial of fluoxetine and placebo in children and adolescents with obsessive-compulsive disorder. *J Am Acad Child Adolesc Psychiatry*. 1992;31(6):1062-1069.
34. March JS, Biederman J, Wolkow R, et al. Sertraline in children and adolescents with obsessive-compulsive disorder: a multicenter randomized controlled trial. *JAMA*. 1998;280(20):1752-1756.
35. Geller DA, Hoog SL, Heiligenstein JH, et al. Fluoxetine treatment for obsessive-compulsive disorder in children and adolescents: a placebo-controlled clinical trial. *J Am Acad Child Adolesc Psychiatry*. 2001;40(7):773-779.
36. Riddle MA, Reeve EA, Yaryura-Tobias JA, et al. Fluvoxamine for children and adolescents with obsessive-compulsive disorder: a randomized, controlled, multicenter trial. *J Am Acad Child Adolesc Psychiatry*. 2001;40(2):222-229.
37. Liebowitz MR, Turner SM, Piacentini J, et al. Fluoxetine in children and adolescents with OCD: a placebo-controlled trial. *J Am Acad Child Adolesc Psychiatry*. 2002;41(12):1431-1438.
38. Cognitive behavior therapy, sertraline, and their combination for children and adolescents with obsessive-compulsive disorder: the Pediatric OCD Treatment Study (POTS) randomized controlled trial. *JAMA*. 2004;292(16):1969-1976.
39. Geller DA, Wagner KD, Emslie G, et al. Paroxetine treatment in children and adolescents with obsessive-compulsive disorder: a randomized, multicenter, double-blind, placebo-controlled trial. *J Am Acad Child Adolesc Psychiatry*. 2004;43(11):1387-1396.
40. Storch EA, Bussing R, Small BJ, et al. Randomized, placebo-controlled trial of cognitive-behavioral therapy alone or combined with sertraline in the treatment of pediatric obsessive-compulsive disorder. *Behav Res Ther*. 2013;51(12):823-829.
41. Robb AS, Cueva JE, Sporn J, Yang R, Vanderburg DG. Sertraline treatment of children and adolescents with posttraumatic stress disorder: a double-blind, placebo-controlled trial. *J Child Adolesc Psychopharmacol*. 2010;20(6):463-471.
